# 1 Skip-mers: increasing entropy and 2 sensitivity to detect conserved genic 3 regions with simple cyclic q-grams

4 **Bernardo J. Clavijo<sup>1</sup>, Gonzalo Garcia Accinelli<sup>1</sup>, Luis Yanes<sup>1</sup>, Katie Barr<sup>1</sup>,  
5 and Jonathan Wright<sup>1</sup>**

6 <sup>1</sup>Earlham Institute, Norwich Research Park, Norwich, NR4 7UZ, UK

7 Corresponding author:

8 Bernardo J. Clavijo

9 Email address: [bernardo.clavijo@earlham.ac.uk](mailto:bernardo.clavijo@earlham.ac.uk)

## 10 ABSTRACT

11 Bioinformatic analyses and tools make extensive use of k-mers (fixed contiguous strings of  $k$  nucleotides)  
12 as an informational unit. K-mer analyses are both useful and fast, but are strongly affected by single-  
13 nucleotide polymorphisms or sequencing errors, effectively hindering direct-analyses of whole regions  
14 and decreasing their usability between evolutionary distant samples. Q-grams or spaced seeds, sub-  
15 sequences generated with a pattern of used-and-skipped nucleotides, overcome many of these limitations  
16 but introduce larger complexity which hinders their wider adoption.

17 We introduce a concept of skip-mers, a cyclic pattern of used-and-skipped positions of  $k$  nucleotides  
18 spanning a region of size  $S \geq k$ , and show how analyses are improved by using this simple subset of  
19 q-grams as a replacement for k-mers. The entropy of skip-mers increases with the larger span, capturing  
20 information from more distant positions and increasing the specificity, and uniqueness, of larger span  
21 skip-mers within a genome. In addition, skip-mers constructed in cycles of 1 or 2 nucleotides in every 3  
22 (or a multiple of 3) lead to increased sensitivity in the coding regions of genes, by grouping together the  
23 more conserved nucleotides of the protein-coding regions.

24 We implemented a set of tools to count and intersect skip-mers between different datasets, a simple task  
25 given that the properties of skip-mers make them a direct substitute for k-mers. We used these tools to  
26 show how skip-mers have advantages over k-mers in terms of entropy and increased sensitivity to detect  
27 conserved coding sequence, allowing better identification of genic matches between evolutionarily distant  
28 species. We then show benefits for multi-genome analyses provided by increased and better correlated  
29 coverage of conserved skip-mers across multiple samples.

30 **Software availability:** the skm-tools implementing the methods described in this manuscript are available  
31 under MIT license at <http://github.com/bioinfologics/skm-tools/>

## 32 1 INTRODUCTION

33 Genomes are not random strings, but are the product of millions of years of evolution and selection  
34 pressure which imparts unique characteristics to the sequence of nucleotides. These characteristics need  
35 to be considered in order to better analyse genomic datasets. Here we exploit the increase in entropy  
36 (mean amount of information) from positions that are further away in the genome (Chaisson et al., 2009),  
37 and the uneven conservation of coding sequence due to synonymous mutations and the neutral model  
38 (Kimura, 1977). The concept of skip-mers extends the familiar concept of k-mers towards a simple cyclic  
39 q-gram that can benefit from these two properties.

40 First, we harness the increased entropy of nucleotides that are further apart by introducing gaps.  
41 This has previously been explored to predict regulatory sequences (Ghandi et al., 2014) and to classify  
42 sequences taxonomically (Hahn et al., 2016) with q-grams. Instead of general q-gram patterns, we define  
43 simple cycles of nucleotide skips which preserve more of the useful properties of k-mers. Second, we  
44 take advantage of the increased conservation present in the first two nucleotides of every trinucleotide  
45 codon by analysing the skip-mer content of genomes in cycles of three. The consideration of these two

46 concepts allowed us to design skip-mers that improve genic region matches for syntenic analyses.

## 47 1.1 From k-mers to skip-mers

48 Bioinformatic analyses make extensive use of k-mers (contiguous strings of k nucleotides) as an informa-  
 49 tional unit, a concept popularised by short read assemblers (Zerbino and Birney, 2008). Analyses within  
 50 the k-mer space benefit from a simple formulation of the sampling problem and direct in-hash comparisons  
 51 (Mapleson et al., 2017). For some analyses, the contiguous nature of k-mers imposes limitations. A  
 52 single base difference, due to real biological variation or a sequencing error, affects all k-mers crossing  
 53 that position thus impeding direct analyses by identity. Also, given the strong interdependence of local  
 54 sequence, contiguous sections capture less information about genome structure and are thus more affected  
 55 by sequence repetition (Chaisson et al., 2009; Birol et al., 2015).

56 Q-grams or spaced seeds are strings of nucleotides constructed from a pattern of used-and-skipped  
 57 positions and have been applied to the sequence matching problem (Kent and Zahler, 2000; Ma et al.,  
 58 2002; Burkhardt and Kärkkäinen, 2003; Darling et al., 2006). The increased entropy due to a larger span  
 59 and the higher tolerance to single base differences makes q-grams a better tool than k-mers for many  
 60 bioinformatics tasks. However, general q-gram analyses can be complicated by the inherent flexibility of  
 61 the concept and the loss of useful properties of k-mers such as reverse complementability.

62 We define skip-mers as a cyclic pattern of used-and-skipped positions which achieves increased  
 63 entropy and tolerance to nucleotide substitution differences by following some simple rules (see Figure  
 64 1 and the next section). Skip-mers preserve many of the elegant properties of k-mers such as reverse  
 65 complementability and existence of a canonical representation which allows strand agnostic analyses  
 66 (Darling et al., 2006). Also, using cycles of three greatly increases the power of direct intersection  
 67 between the genomes of different organisms by grouping together the more conserved nucleotides of the  
 68 protein-coding regions, a property already used by the short 11011011 seeds of the WABA algorithm  
 69 (Kent and Zahler, 2000). Skip-mers can then be described as a sub-set of q-grams or spaced seeds or a  
 70 generalisation of the 11011011 seeds first described in WABA: a set of simple cyclic q-grams that increase  
 71 entropy and sensitivity when analysing divergent coding sequence.

## 72 1.2 Skip-mer definition

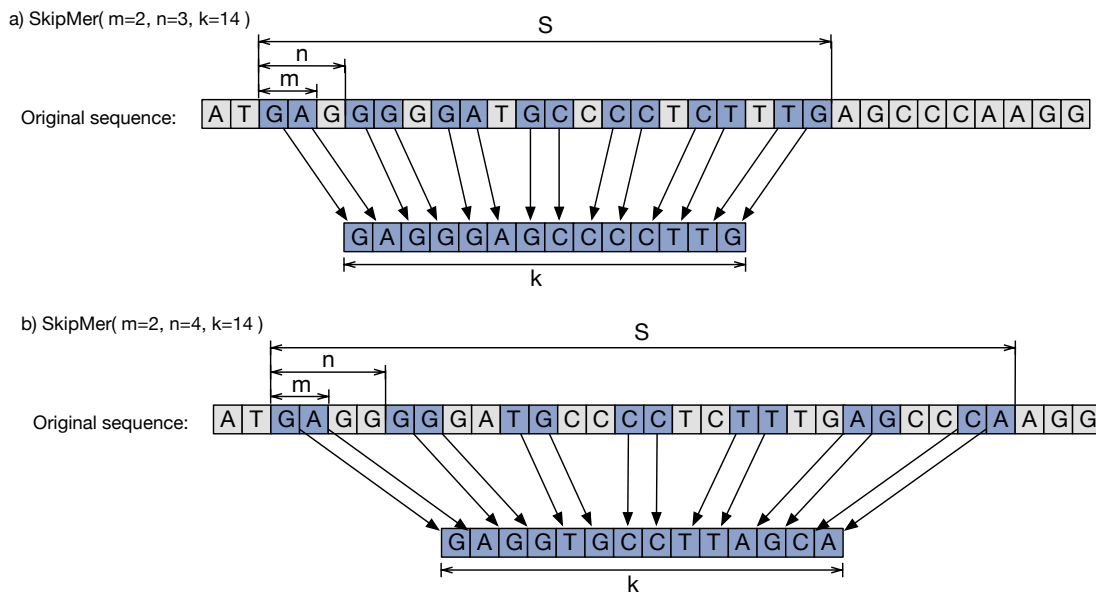

**Figure 1.** Different  $SkipMer(m, n, k)$  cycles defined over the same sequence region, resulting in different combinations of bases. The shape of the underlying cyclic q-gram is defined by the variables  $m$  (used bases per cycle),  $n$  (cycle length), and  $k$  (total number of bases).

73 A skip-mer is a simple cyclic q-gram that includes  $m$  out of every  $n$  bases until a total of  $k$  bases is  
 74 reached. Its shape is defined by a function  $SkipMer(m, n, k)$ , as shown in Figure 1. To maintain cyclic

75 properties and the existence of the reverse-complement as a skip-mer defined by the same function,  $k$   
76 must be a multiple of  $m$ . This also allows a canonical representation for each skip-mer, defined as the  
77 lexicographically smaller of the forward and reverse-complement representations.

78 Defining  $m$ ,  $n$  and  $k$  fixes a value for  $S$ , the total span of the skip-mer, given by:

$$S = n \times \left( \frac{k}{m} - 1 \right) + m$$

79 It is important to note that  $k$ -mers are a sub-class of skip-mers. A skip-mer with  $m = n$  will use all  
80 contiguous  $k$  nucleotides, which makes it a  $k$ -mer. Throughout this manuscript we often use  $m = 1 \wedge n = 1$ ,  
81 or the shorter form notations  $l-1$  or  $l-1-k$  to refer to  $k$ -mers.

## 82 2 MATERIALS & METHODS

### 83 2.1 Genome sequences and annotations

84 To evaluate the properties of skip-mers in a genomic context we used publically available genome  
85 assemblies.

86 Hexaploid bread wheat, *Triticum aestivum* (Clavijo et al., 2017), is a highly repetitive and complex  
87 genome, and we used it to investigate the effect of the increased entropy when using larger skip-mer  
88 cycles. *Oryza sativa* (Kawahara et al., 2013) and *Brachypodium distachyon* (Vogel et al., 2010) were used  
89 as a typical example of synteny in plants, with *Arabidopsis thaliana* (Lamesch et al., 2012) providing a  
90 well annotated and distant genome for the 3-way comparisons. *Homo sapiens* (Schneider et al., 2017),  
91 *Mus musculus* (Waterston and Pachter, 2002) and *Canis familiaris* (Lindblad-Toh et al., 2005) were used  
92 for 2-way and 3-way comparisons between mammal genomes. *Drosophila melanogaster* and eleven  
93 other fly genomes (Clark et al., 2007) were used for the multi-way comparison and the presence score  
94 analysis. *Escherichia coli* and seven other *Enterobacteriaceae* genomes available from NCBI were used,  
95 with accessions: NC\_000913.3 (*Escherichia coli*), NZ\_CP007557.1 (*Citrobacter freundii*), NC\_003197.1  
96 (*Salmonella enterica*), CP003678.1 (*Enterobacter cloacae*), NZ\_CP013990.1 (*Leclercia adecarboxylata*),  
97 NC\_012917.1 (*Pectobacterium carotovorum*), NZ\_CP016889.1 (*Pantoea agglomerans*), and NC\_003143.1  
98 (*Yersinia pestis*).

99 In all analyses where gene regions were used, we downloaded the current GFF3 annotations from  
100 Ensembl (Yates et al., 2015) and used a a minimum gene size of 100bp.

### 101 2.2 skm-tools: skip-mer intersection and coverage analyses

102 All skip-mer intersection analyses and skip-mer spectra were computed with our skm-tools, available  
103 at <http://github.com/bioinfologics/skm-tools/>. The implementation is based on sorted lists of canonical  
104 skip-mers with added attributes such as position on the reference genomes or number of occurrences in a  
105 dataset.

106 In particular, the following tools have been used in the preparation of this manuscript:

107 **skm-count** counts the number of occurrences of each distinct canonical skip-mer in a fasta input and  
108 outputs a spectra histogram.

109 **skm-multiway-coverage** receives a reference fasta, optionally alongside a GFF3 file and a feature name,  
110 and any number of extra datasets. The intersection of skip-mers from all the extra datasets is  
111 computed versus the reference dataset, shared-by-all skip-mers statistics are reported as each  
112 genome is processed (See Figure 4 for an example progression). If a GFF3 and a feature name is  
113 provided, the output will classify the skip-mers according to their presence in regions annotated  
114 with the feature, and a file with details of coverage for each feature by each of the extra datasets  
115 will be produced.

116 The current implementation of the skm-multiway-coverage tool includes a coverage cut-off that  
117 defaults to 1 as this is appropriate for the current study. All skip-mers that are at a higher frequency than  
118 the cut-off are eliminated before any analysis. To consider candidate matches for alignment of conserved  
119 sequence it is appropriate to discard skip-mers with a higher copy number than your expected number of  
120 matches as this will filter repetitive matches including background noise. While our current choice of  
121 cut-off at 1 makes sense in a general analysis as the one presented in this manuscript, care needs to be  
122 taken to make reasonable choices for future applications.

## 2.3 Coverage score

The coverage score is used as a proxy for sequence conservation. To approximate a measure of conserved nucleotides, the coverage is projected over individual nucleotides rather than directly counting shared skip-mers which would introduce redundancy from phased matches. An equivalent coverage metric for spaced seeds can be found in Noé and Martin (2014) where it is also used to estimate distances. The score for each feature (i.e. gene) versus each genome in the multi-way analyses is calculated as the total number of bases that are included in matching skip-mers from that genome divided by the total number of bases that are covered by valid (i.e. copy number below threshold in the reference) skip-mers from the reference:

$$\text{Coverage score} = \frac{\text{Bases covered by matching skip-mers}}{\text{Bases covered by valid reference skip-mers}}$$

The coverage cut-off is applied before any analyses are performed. When using the default cut-off of 1, skip-mers that have a higher copy number in the reference will not be evaluated for scoring and skip-mers that have a single copy in the reference but more than one copy in the scoring genome will not be counted as covered.

## 3 RESULTS

### 3.1 Increasing a skip-mer cycle length and span increases specificity

We analysed a genome assembly of *Triticum aestivum* to investigate the effect of the cycle size  $n$  in the multiplicity of the skip-mers in a genome. Figure 2 shows how increasing  $n$ , and thus the total span of a skip-mer ( $S$ ), increases the entropy for each skip-mer. The increased entropy decreases the number of copies of each distinct skip-mer in the genome. This ultimately results in more unique skip-mers. In the wheat genome, there are more than twice as many unique skip-mers using *SkipMer*(1, 16, 31) as there are using *SkipMer*(1, 1, 31) which corresponds to a 31-mers.

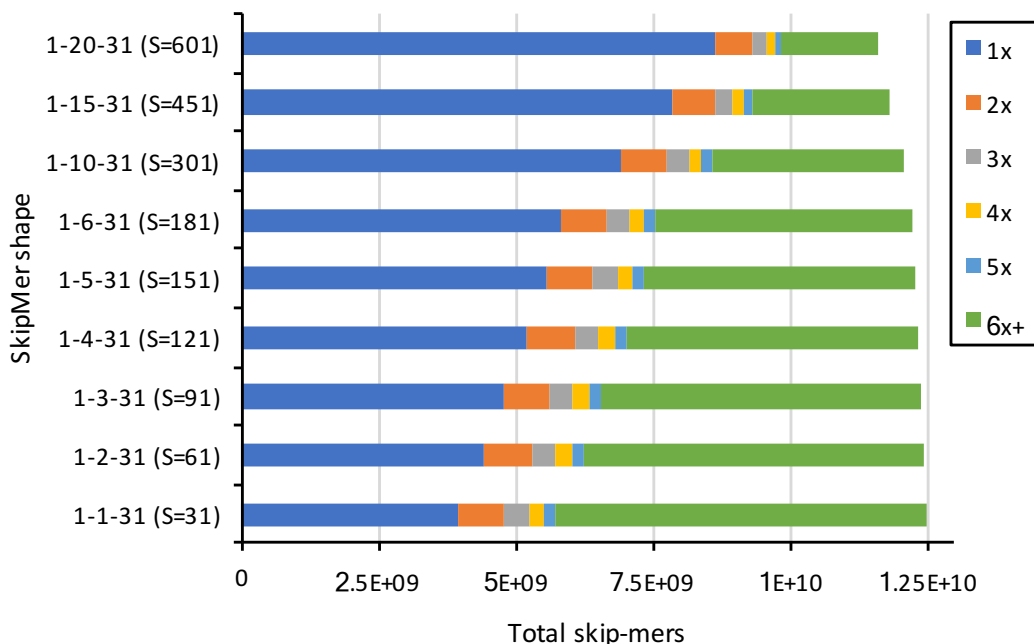

**Figure 2.** Multiplicity as a function of  $n$  for skip-mers in *Triticum aestivum*. Each bar represents the total number of skip-mers in the assembly, so a skip-mer appearing  $x$  times contributes  $x$  units in the  $x$  component. All skip-mers use 31bp ( $k = 31$ ) and 1bp per cycle ( $m = 1$ ).

144 **3.2 Using triplet-based cycles increases perfect skip-mer matches in conserved genic**  
 145 **sequence between species**

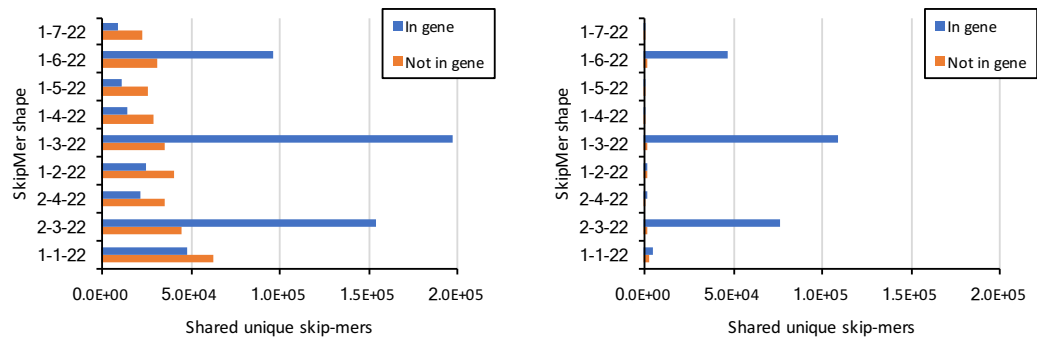

(a) 2-way: *Arabidopsis thaliana*  $\wedge$  *Orzya sativa*

(b) 3-way: *Arabidopsis thaliana*  $\wedge$  *Orzya sativa*  $\wedge$  *Brachypodium distachion*

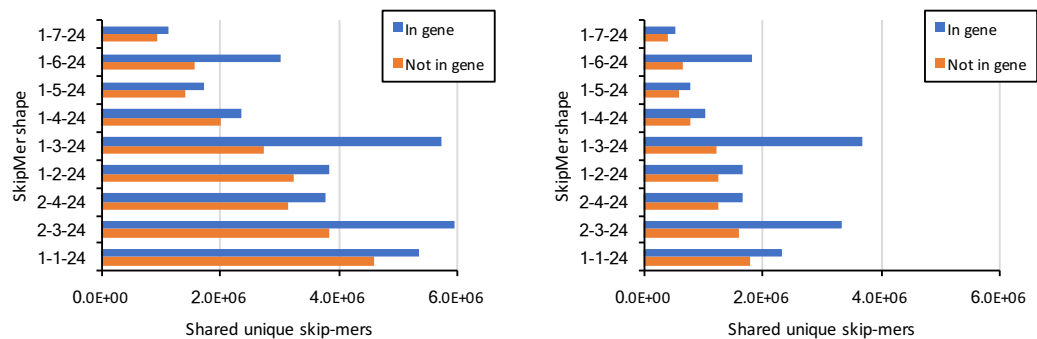

(c) 2-way: *Homo sapiens*  $\wedge$  *Mus musculus*

(d) 3-way: *Homo sapiens*  $\wedge$  *Mus musculus*  $\wedge$  *Canis familiaris*

**Figure 3.** Effect of different combinations of  $m$  and  $n$ , while keeping  $k$  constant, for 2-way and 3-way skip-mer intersections. Only unique skip-mers are considered and skip-mers originating from sequence annotated with gene features on the first genome are classified as "In gene". The skip-mer shapes are sorted along the vertical axis according to total skip-mer span ( $S$ ), with the largest span on top.

146 Synonymous mutations which are not removed by purifying selection, because they do not affect the  
 147 amino-acid encoded by a trinucleotide codon, produce a cycle-3 modulation in conserved coding regions  
 148 (Kimura, 1977). Skip-mers with cycle lengths that are a multiple of 3 ( $n = 3c$ ) group first and/or second  
 149 nucleotides in subsequent in-frame codons, to increase sensitivity on  $SkipMer(m, n = 3c, k)$  to detect  
 150 conserved coding regions.

151 Figure 3 shows how, for the 2-way intersections in (a) and (c), the shared skip-mers in non-genic  
 152 regions decrease as the span increases, in agreement with the increase of entropy and thus uniqueness. In  
 153 genic regions, this higher entropy is combined with increased sensitivity for coding sequence resulting in  
 154 increased matches when  $n = 3c$ . This effect is further accentuated in the 3-way intersections in (b) and  
 155 (d), due to independent synonymous mutations in the 3 genomes.

156 The best result in terms of sensitivity for three of the four examples is produced by  $SkipMer(1, 3, k)$   
 157 which groups the nucleotides according to their position in the codon. While  $SkipMer(2, 3, 24)$  presents a  
 158 slightly larger number of "In gene" matches in (c),  $SkipMer(1, 3, 24)$  with its larger span decreases the  
 159 number of "Not in gene" matches, which makes it a better choice.

160 **3.3 Conserved sequence from  $n=3$  skip-mers enables direct intersection analyses across**  
 161 **many samples at diverse evolutionary distances**

162 One of the limitations of  $k$ -mers for direct intersection analyses among many samples is the decrease in  
 163 probability of finding  $k$ -mers that are shared across all of the samples. The results from our 2-way and

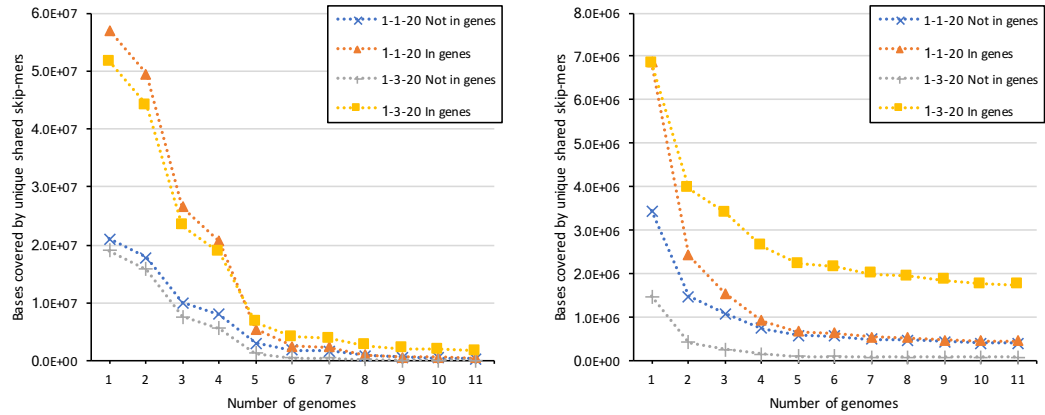

(a) Bases covered by unique shared skip-mers when adding more genomes, *D. melanogaster*, closer genomes first.

(b) Bases covered by unique shared skip-mers when adding more genomes, *D. melanogaster*, more distant genomes first.

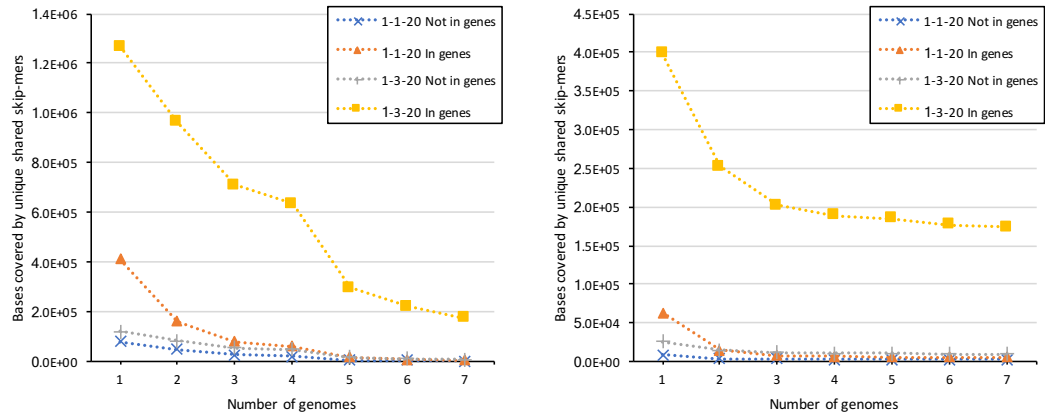

(c) Bases covered by unique shared skip-mers when adding more genomes, *E. coli*, closer genomes first.

(d) Bases covered by unique shared skip-mers when adding more genomes, *E. coli*, more distant genomes first.

**Figure 4.** Bases covered by unique shared skip-mers shared across all genomes, for sets of different numbers of genomes from the 12 *Drosophila* dataset and the 7 *Enterobacteriaceae* genomes.

164 3-way analyses show that skip-mers are more sensitive to conserved coding sequence. We intersected both  
 165 the twelve *Drosophila* genomes from Clark et al. (2007) and the *Enterobacteriaceae* dataset to explore  
 166 how coverage over the reference from unique shared skip-mers decreases both in genic and non-genic  
 167 regions as we progressively include more samples.

168 In Figure 4 (a) the eleven other genomes are incorporated into the *Drosophila melanogaster* based  
 169 analysis starting from the closest to *D. melanogaster* in the phylogeny proposed by Clark et al. (2007): *D.*  
 170 *simulans*, *D. sechellia*, *D. yakuba*, *D. ananassae*, *D. erecta*, *D. pseudoobscura*, *D. willistoni*, *D. virilis*, *D.*  
 171 *mojavensis*, and *D. grimshawi*. In Figure 4 (b) this order is reversed, starting from *D. grimshawi* and ending  
 172 with *D. simulans*. The order of *Enterobacteriaceae* genomes in Figure 4 (c) is: *Citrobacter freundii*,  
 173 *Salmonella enterica*, *Enterobacter cloacae*, *Leclercia adecarboxylata*, *Pectobacterium carotovorum*,  
 174 *Pantoea agglomerans*, and *Yersinia pestis*. In Figure 4 (d) this order is reversed, starting from *Yersinia*  
 175 *pestis* and ending with *Citrobacter freundii*.

176 In every analysis shown in Figure 4 the genic intersection computed by *SkipMer*(1,3,20) is less  
 177 affected by the introduction of extra genomes due to the increased sensitivity in the conserved coding  
 178 regions. In Figure 4 (a), the first four genomes show a small increase in sensitivity when using k-mers,  
 179 due to their closeness to the reference, but the effect is reversed after the incorporation of the fifth  
 180 genome. In Figure 4 (b), the first genome shows only a difference for "not-in-gene" matches, with the  
 181 cycle-3 skip-mers being less conserved outside coding constraints; from the second genome onwards, the



182 advantages of skip-mers become more evident. In Figures 4 (c) and 4 (d) the larger evolutionary distance  
183 increases the effects of skip-mer conservation in the analysis. All these results show how skip-mers can  
184 be used to provide a small set of conserved sequences across the diverse genomes in the datasets.

185 **3.4 Coverage of matching sequence across many samples using skip-mers with n=3**  
186 **shows higher correlation than using k-mers**

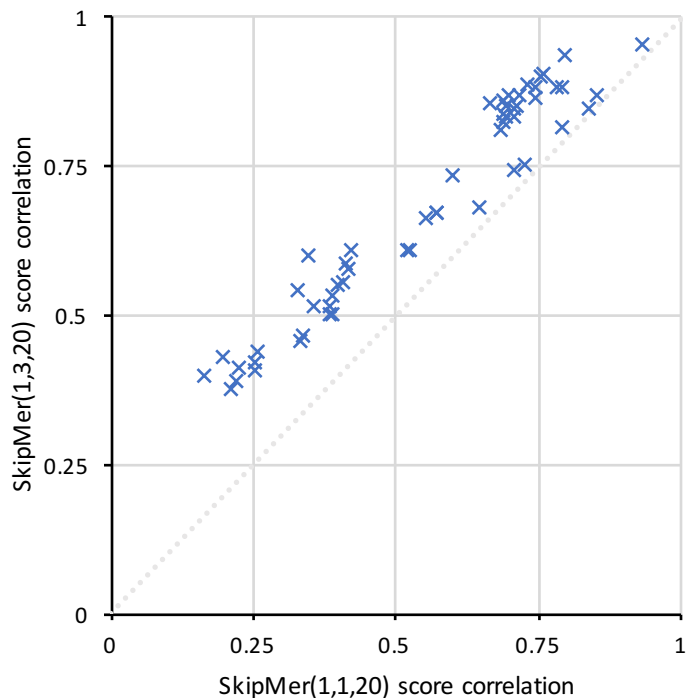

**Figure 5.** Comparison of correlations for the coverage scores of the *Drosophila melanogaster*. Points above the 1:1 line represent genome pairs with better score correlation in *SkipMer*(1, 3, 20) than in *SkipMer*(1, 1, 20) (equivalent to 20-mers).

187 To explore the advantages of the *SkipMer*(1, 3, *k*) analyses across divergent genomes we compared the  
188 properties of sequence coverage for *Drosophila melanogaster* to the eleven other *Drosophila* genomes and  
189 for *Escherichia coli* to the seven other *Enterobacteriaceae* using *SkipMer*(1, 1, 20), which is equivalent  
190 to a 20-mer, and *SkipMer*(1, 3, 20). We implement a base coverage score as described in section 2.3 and  
191 assigned each gene with a length of 100bp or more in the reference a coverage score between 0 and 1 for  
192 each of the genomes.

193 A distribution analysis for the scores per genome (Supplementary Figure S1) shows the more divergent  
194 genomes increase their scores for sequence coverage in genes when using *SkipMer*(1, 3, 20). This reflects  
195 the increased sensitivity of cycle-3 skip-mers within coding regions. This score increase is particularly  
196 large in the bacteria dataset, where the samples are more evolutionary distant.

197 We computed correlations between the gene scores for *D. melanogaster* from every pair of the other  
198 11 genomes for both *SkipMer*(1, 1, 20) and *SkipMer*(1, 3, 20) (See Supplementary Material Tables S1  
199 and S2, and Figures S2 and S3). Figure 5 shows the comparison between each genome-pair correlation on  
200 *SkipMer*(1, 1, 20) and *SkipMer*(1, 3, 20). There is increased correlation when using cycle-3 skip-mers,  
201 with larger relative improvements on the less correlated genome pairs. This suggests cycle-3 skip-mers  
202 provide a more robust coverage score which can be better used as a proxy for evolutionary pressure and  
203 selection.

204 The score for the *Enterobacteriaceae* dataset when using k-mers is so low, and the effect of gene  
205 divergence and gain/loss so pronounced, that computing a correlation for scores would not correspond with  
206 conservation differences without a more elaborate analysis. The scatter plots of scores in Supplementary

207 Figures S4 and S5 illustrate this point and the improvements on scores with skip-mers.

## 208 **4 DISCUSSION**

209 Increasing the span of skip-mers increases their entropy when sampled from a genome. Using this  
210 increased-entropy analysis unit rather than k-mers will enable more informative analyses with small  
211 adaptations to existing techniques. We expect this key feature of the data points having the same amount  
212 of data (bp) but increased entropy to enable more exhaustive or significant analyses in roughly similar  
213 computational space and time.

214 The analysis of sequence in cyclic groups of  $n = 3$  increases sensitivity to detect conserved coding  
215 sequence by grouping the nucleotides in synchronisation with the codon positions. In the typical case  
216 of *SkipMer*( $m = 1, n = 3, k$ ) there will be, for the same group of  $k$  contiguous codons, a skip-mer  
217 containing all first nucleotides, a skip-mer containing all second nucleotides and a skip-mer containing all  
218 third nucleotides. This grouping increases perfect matches in genes from first-nucleotide position and  
219 second-nucleotide position skip-mers, providing an alternative to the use of protein translation analyses.

220 When computing multi-genome intersections, there is a stronger signal of conservation across multiple  
221 divergent genomes from  $n = 3$  skip-mers than from contiguous sequences such as k-mers. Because  
222 of the better correspondence between sequence that is actively conserved and the set of matches, the  
223 reduction in matches due to the addition of extra genomes in intermediate positions in the phylogeny is  
224 less pronounced. Also, the coding sequence coverage by direct matches is a more robust metric, which  
225 enables the direct comparison of results produced from different sets of genomes.

226 A complementary effect to the concentration of more conserved sequence, from first and second  
227 nucleotides, in the cycle-3 skip-mers is the concentration of more variable sequence, from third nucleotides,  
228 in a small number of skip-mers. In the preceding analyses, these more variable nucleotides have been  
229 discarded with the noise and repetitions. For applications where a weak signal for variation needs to be  
230 analysed, skip-mers can be leveraged to provide a very high entropy set of sequences to give increased  
231 discrimination power.

232 Our results, in addition to confirming and expanding previous work on q-grams and spaced-seeds,  
233 suggest skip-mers will have a wide range of applications in bioinformatic analyses. For whole-genome  
234 and multi-genome alignment, skip-mers will provide accurate conserved seeds, and more specific matches  
235 in complex regions. For evolutionary analyses, skip-mers will allow improved detection of functionally  
236 equivalent regions. For RNA-seq and exome analyses, skip-mers will provide a meaningful set of starting  
237 seeds or a projection base, thus enabling more distant samples to be analysed together either against a  
238 reference or in a reference-free manner.

239 Skip-mers will also be useful in raw read analyses. For classification of sequences, or species detection,  
240 skip-mers will provide better clustering of coding regions from a common origin, and could even be  
241 used to estimate conservation scores for single reads. Aligning skip-mers from raw reads to one or many  
242 references will guide the reconstruction of conserved regions while considering novel variants. These  
243 conserved region intersected representations can then be used to quickly characterise the genic space of a  
244 genome.

## 245 **CONCLUSIONS**

246 We have shown how skip-mer based analyses benefit from extra entropy and sensitivity to outperform  
247 k-mer based analyses given the non-random nature of genomic sequence. These principles stand across a  
248 wide range of prokaryotic and eukaryotic genomes and in different multi-genome scenarios, improving  
249 the analysis of conserved coding regions. Common k-mer based techniques can easily adopt skip-mers,  
250 due to their many shared properties. Both constructions are reversible strings of nucleotides that can  
251 be made strand-agnostic with canonical representations. In general, with a genomic landscape that is  
252 shifting to in-field sampling and exploring more diversity than ever before, we expect skip-mers and other  
253 evolution-friendly information units to provide the basis for a new generation of biological analyses.

## 254 **AUTHORS CONTRIBUTIONS**

255 BJC and GG developed the initial concepts and discussed implications and refinements over time. BJC  
256 implemented the first version of the *skm-tools*, ran the analyses and produced the first draft of the



257 manuscript. LY contributed optimisations and improvements for the *skm-tools*. All authors tested the  
258 *skm-tools*; discussed analyses, results and improvements; and contributed to the final version of the  
259 manuscript.

## 260 ACKNOWLEDGMENTS

261 The authors would like to thank Wilfried Haerty for his support on the analysis of the *Drosophila* genomes,  
262 and C. Titus Brown for his input on the microbial genomes analysis. The authors also thank Erik Garrison,  
263 Mark McMullan, Neil Hall, Norma Paniago, Manfred Grabherr, Laurent No   and Federica di Palma for  
264 their useful comments and feedback.

## 265 REFERENCES

- 266 Birol, I., Chu, J., Mohamadi, H., Jackman, S. D., Raghavan, K., Vandervalk, B. P., Raymond, A., and  
267 Warren, R. L. (2015). Spaced seed data structures for de novo assembly. *International journal of*  
268 *genomics*, 2015.
- 269 Burkhardt, S. and K  rkk  inen, J. (2003). Better filtering with gapped q-grams. *Fundamenta informaticae*,  
270 56(1-2):51–70.
- 271 Chaisson, M. J., Brinza, D., and Pevzner, P. A. (2009). De novo fragment assembly with short mate-paired  
272 reads: Does the read length matter? *Genome research*, 19(2):336–346.
- 273 Clark, A. G., Eisen, M. B., Smith, D. R., Bergman, C. M., Oliver, B., Markow, T. A., Kaufman, T. C.,  
274 Kellis, M., Gelbart, W., Iyer, V. N., et al. (2007). Evolution of genes and genomes on the drosophila  
275 phylogeny. *Nature*, 450(7167):203.
- 276 Clavijo, B. J., Venturini, L., Schudoma, C., Accinelli, G. G., Kaithakottil, G., Wright, J., Borrill, P.,  
277 Kettleborough, G., Heavens, D., Chapman, H., Lipscombe, J., Barker, T., Lu, F.-H., McKenzie, N.,  
278 Raats, D., Ramirez-Gonzalez, R. H., Coince, A., Peel, N., Percival-Alwyn, L., Duncan, O., Tr  sch,  
279 J., Yu, G., Bolser, D. M., Namaati, G., Kerhornou, A., Spannagl, M., Gundlach, H., Haberer, G., Davey,  
280 R. P., Fosker, C., Palma, F. D., Phillips, A., Millar, A. H., Kersey, P. J., Uauy, C., Krasileva, K. V.,  
281 Swarbreck, D., Bevan, M. W., and Clark, M. D. (2017). An improved assembly and annotation of the  
282 allohexaploid wheat genome identifies complete families of agronomic genes and provides genomic  
283 evidence for chromosomal translocations. *Genome Research*.
- 284 Darling, A. E., Treangen, T. J., Zhang, L., Kuiken, C., Messeguer, X., and Perna, N. T. (2006). Procrasti-  
285 nation leads to efficient filtration for local multiple alignment. In *International Workshop on Algorithms*  
286 *in Bioinformatics*, pages 126–137. Springer.
- 287 Ghandi, M., Lee, D., Mohammad-Noori, M., and Beer, M. A. (2014). Enhanced regulatory sequence  
288 prediction using gapped k-mer features. *PLoS computational biology*, 10(7):e1003711.
- 289 Hahn, L., Leimeister, C.-A., Ounit, R., Lonardi, S., and Morgenstern, B. (2016). Rasbhari: optimizing  
290 spaced seeds for database searching, read mapping and alignment-free sequence comparison. *PLoS*  
291 *computational biology*, 12(10):e1005107.
- 292 Kawahara, Y., de la Bastide, M., Hamilton, J. P., Kanamori, H., McCombie, W. R., Ouyang, S., Schwartz,  
293 D. C., Tanaka, T., Wu, J., Zhou, S., et al. (2013). Improvement of the oryza sativa nipponbare reference  
294 genome using next generation sequence and optical map data. *Rice*, 6(1):4.
- 295 Kent, W. J. and Zahler, A. M. (2000). Conservation, regulation, synteny, and introns in a large-scale c.  
296 briggsae–c. elegans genomic alignment. *Genome research*, 10(8):1115–1125.
- 297 Kimura, M. (1977). Preponderance of synonymous changes as evidence for the neutral theory of molecular  
298 evolution. *Nature*, 267(5608):275–276.
- 299 Lamesch, P., Berardini, T. Z., Li, D., Swarbreck, D., Wilks, C., Sasidharan, R., Muller, R., Dreher, K.,  
300 Alexander, D. L., Garcia-Hernandez, M., Karthikeyan, A. S., Lee, C. H., Nelson, W. D., Ploetz, L.,  
301 Singh, S., Wensel, A., and Huala, E. (2012). The arabidopsis information resource (tair): improved  
302 gene annotation and new tools. *Nucleic Acids Research*, 40(D1):D1202–D1210.
- 303 Lindblad-Toh, K., Wade, C. M., Mikkelsen, T. S., Karlsson, E. K., et al. (2005). Genome sequence,  
304 comparative analysis and haplotype structure of the domestic dog. *Nature*, 438(7069):803.
- 305 Ma, B., Tromp, J., and Li, M. (2002). Patternhunter: faster and more sensitive homology search.  
306 *Bioinformatics*, 18(3):440–445.
- 307 Mapleson, D., Garcia Accinelli, G., Kettleborough, G., Wright, J., and Clavijo, B. J. (2017). Kat: a k-mer  
308 analysis toolkit to quality control ngs datasets and genome assemblies. *Bioinformatics*, 33(4):574–576.

- 309 Noé, L. and Martin, D. E. (2014). A coverage criterion for spaced seeds and its applications to support  
310 vector machine string kernels and k-mer distances. *Journal of Computational Biology*, 21(12):947–963.
- 311 Schneider, V. A., Graves-Lindsay, T., Howe, K., Bouk, N., Chen, H.-C., Kitts, P. A., Murphy, T. D.,  
312 Pruitt, K. D., Thibaud-Nissen, F., Albracht, D., et al. (2017). Evaluation of grch38 and de novo haploid  
313 genome assemblies demonstrates the enduring quality of the reference assembly. *Genome research*,  
314 27(5):849–864.
- 315 Vogel, J. P., Garvin, D. F., Mockler, T. C., Schmutz, J., Rokhsar, D., Bevan, M. W., Barry, K., Lucas,  
316 S., Harmon-Smith, M., Lail, K., et al. (2010). Genome sequencing and analysis of the model grass  
317 brachypodium distachyon. *Nature*, 463(7282):763–768.
- 318 Waterston, R. H. and Pachter, L. (2002). Initial sequencing and comparative analysis of the mouse genome.  
319 *Nature*, 420(6915):520–562.
- 320 Yates, A., Akanni, W., Amode, M. R., Barrell, D., Billis, K., Carvalho-Silva, D., Cummins, C., Clapham,  
321 P., Fitzgerald, S., Gil, L., et al. (2015). Ensembl 2016. *Nucleic acids research*, 44(D1):D710–D716.
- 322 Zerbino, D. R. and Birney, E. (2008). Velvet: algorithms for de novo short read assembly using de bruijn  
323 graphs. *Genome research*, 18(5):821–829.
